# Supplementary material for: C3 symmetric ferrocenyl triazines: synthesis, structure, and properties
Source: Royal Society of Chemistry journal article supplement (doi:10.1039/c2ra23153k), 2012-12-22
Supplement: c2ra23153k.pdf [file c2ra23153k.pdf]

## Supporting Information

### **C<sub>3</sub> Symmetric Ferrocenyl Triazines: Synthesis, Structure, and Properties**

**Ramesh Maragani <sup>a</sup>, Thaksen Jadhav <sup>a</sup>, Shaikh M. Mobin <sup>a</sup>, Rajneesh Misra,<sup>\*a</sup>**

**\*Department of Chemistry**

Indian Institute of Technology Indore, Indore- 452 017, India

Corresponding author. Tel.: +91 731 2438710; fax: +91 731 2361482, Email: rajneeshmisra@iiti.ac.in

## Table of content

- 1) General Experimental section
- 2) Structures and  $^1\text{H}$  NMR,  $^{13}\text{C}$  NMR, and Mass (HRMS) spectroscopy data and TGA, DSC data, Cyclic voltammograms of ferrocene substituted triazine **3-6**
- 3) TGA graphs of compounds **3-6**
- 4) The selected bond lengths, and bond angles of compound **3**
- 5) Crystallographic data and conformational structures, and structure refinement details of compound **3**

**1) General Experimental.**  $^1\text{H}$  NMR (400 MHz), and  $^{13}\text{C}$  NMR (100MHz) spectra were recorded on Bruker Advance (III) 400 MHz. Chemical shifts in  $^1\text{H}$ , and  $^{13}\text{C}$  NMR spectra were reported in parts per million (ppm) with TMS (0 ppm), and  $\text{CDCl}_3$  (77.23 ppm) as standards. UV-Visible absorption spectra of all compounds in  $\text{CH}_2\text{Cl}_2$  were recorded on Carry-100 Bio UV-Visible Spectrophotometer. All microwave reactions were performed on CEM Discover microwave instrument (Model No – 908010). Electrochemical characterization of all compounds was done by cyclic voltametry. Cyclic voltammograms (CVs) was recorded on CHI620D electrochemical analyzer using Glassy carbon as a working electrode, Platinum wire as the counter electrode, and Ag/AgCl as the reference electrode. The scan rate was 100 mVS-1. A solution of tetrabutylammonium - hexafluorophosphate ( $\text{TBAPF}_6$ ) in THF (0.1 M) was employed as the supporting electrolyte. The half-wave oxidation potential of ferrocene was measured to be 0.58 V against Ag/AgCl. HRMS was recorded on Bruker-Daltonics, Micro-TOF-Q II mass spectrometer. Column chromatography was performed on Merck silica gel (230-400 mesh). All reagents were obtained from commercial sources, and used as received unless otherwise stated.

**2) Synthesis, and Structures and  $^1\text{H}$  NMR,  $^{13}\text{C}$  NMR, and Mass (HRMS) spectroscopy data and TGA, DSC data, cyclic voltammograms of ferrocene substituted triazine 3-6**

|                                                                                             | Page No |
|---------------------------------------------------------------------------------------------|---------|
| Fig. S-1: $^1\text{H}$ -NMR spectrum of compound <b>3</b> recorded in $\text{CDCl}_3$ .     | 6       |
| Fig. S-2: $^{13}\text{C}$ -NMR spectrum of compound <b>3</b> recorded in $\text{CDCl}_3$ .  | 6       |
| Fig. S-3: HRMS mass spectrum of compound <b>3</b>                                           | 7       |
| Fig. S-4: TGA and DSC spectrum of compound <b>3</b>                                         | 8       |
| Fig. S-5: Cyclic Voltammogram of compound <b>3</b>                                          | 8       |
| Fig. S-6: $^1\text{H}$ -NMR spectrum of compound <b>4</b> recorded in $\text{CDCl}_3$       | 10      |
| Fig. S-7: $^{13}\text{C}$ -NMR spectrum of compound <b>4</b> recorded in $\text{CDCl}_3$    | 10      |
| Fig. S-8: HRMS mass spectrum of compound <b>4</b>                                           | 11      |
| Fig. S-9: TGA and DSC spectrum of compound <b>4</b>                                         | 12      |
| Fig. S-10: Cyclic Voltammogram of compound <b>4</b>                                         | 12      |
| Fig. S-11: $^1\text{H}$ -NMR spectrum of compound <b>5</b> recorded in $\text{CDCl}_3$ .    | 14      |
| Fig. S-12: $^{13}\text{C}$ -NMR spectrum of compound <b>5</b> recorded in $\text{CDCl}_3$ . | 14      |
| Fig. S-13: HRMS mass spectrum of compound <b>5</b> .                                        | 15      |
| Fig. S-14: TGA and DSC spectrum of compound <b>5</b>                                        | 16      |
| Fig. S-15: Cyclic Voltammogram of compound <b>5</b>                                         | 16      |
| Fig. S-16: $^1\text{H}$ -NMR spectrum of compound <b>6</b> recorded in $\text{CDCl}_3$ .    | 18      |
| Fig. S-17: $^{13}\text{C}$ -NMR spectrum of compound <b>6</b> recorded in $\text{CDCl}_3$ . | 18      |
| Fig. S-18: HRMS mass spectrum of compound <b>6</b> .                                        | 19      |
| Fig. S-19: TGA and DSC spectrum of compound <b>6</b>                                        | 20      |
| Fig. S-20: Cyclic Voltammogram of compound <b>6</b>                                         | 20      |



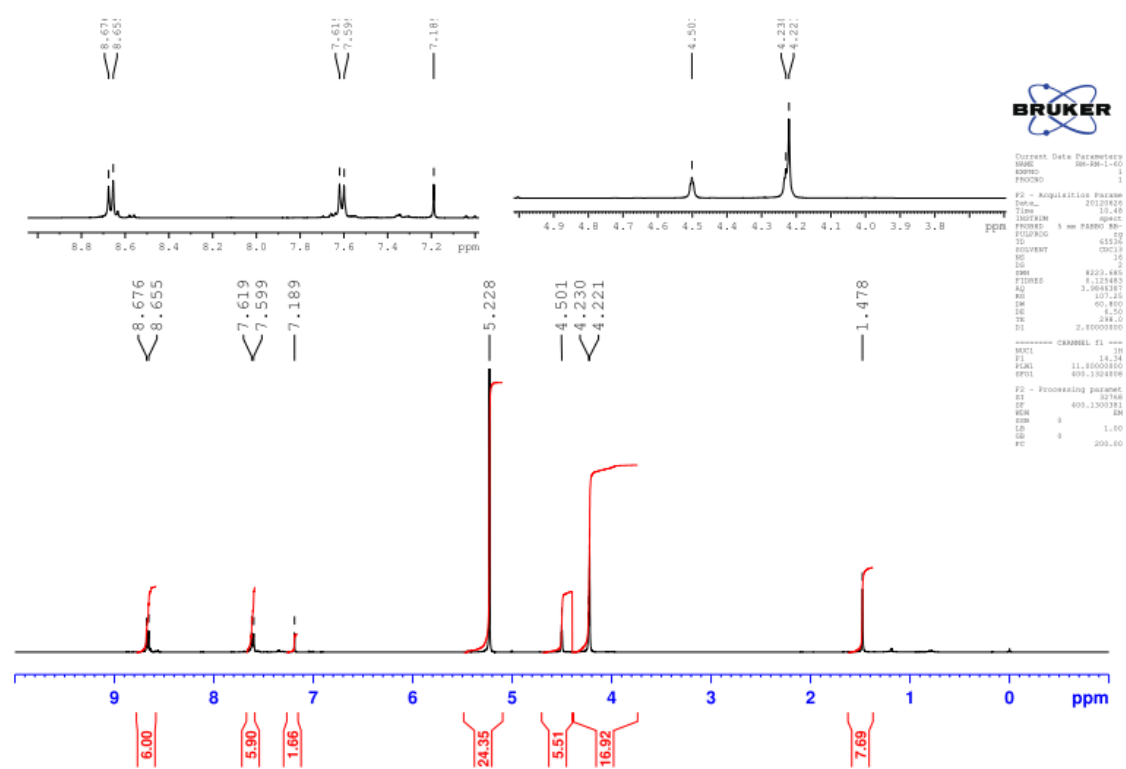

**Fig. S-1:** <sup>1</sup>H-NMR spectrum of compound **3** recorded in CDCl<sub>3</sub>.

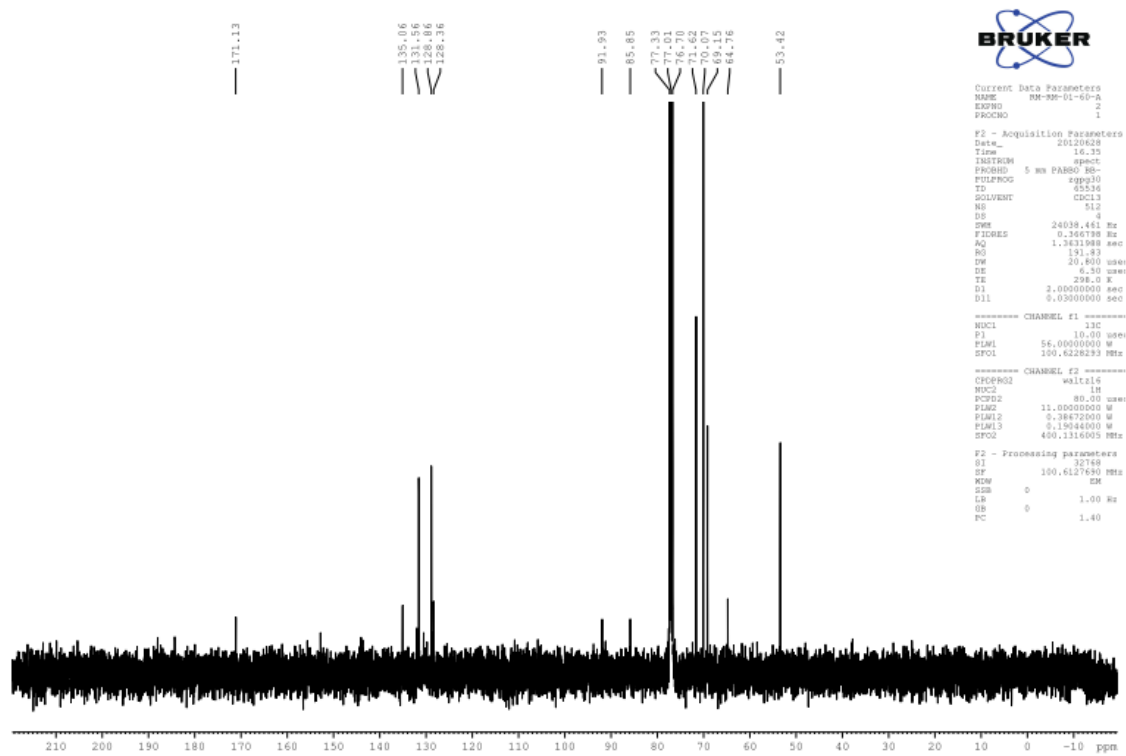

**Fig. S-2:** <sup>13</sup>C-NMR spectrum of compound **3** recorded in CDCl<sub>3</sub>.

**Analysis Info**  
Analysis Name D:\Data\UserData\RM-RM-01-60 31-07-2012 HRMS.d  
Method tune\_high.m  
Sample Name  
Comment

Acquisition Date 7/31/2012 4:17:29 PM  
Operator Ghanashyam  
Instrument micrOTOF-Q II 10348

**Acquisition Parameter**

|             |            |                       |            |                  |           |
|-------------|------------|-----------------------|------------|------------------|-----------|
| Source Type | ESI        | Ion Polarity          | Positive   | Set Nebulizer    | 0.4 Bar   |
| Focus       | Not active | Set Capillary         | 4500 V     | Set Dry Heater   | 180 °C    |
| Scan Begin  | 50 m/z     | Set End Plate Offset  | -500 V     | Set Dry Gas      | 4.0 l/min |
| Scan End    | 3000 m/z   | Set Collision Cell RF | 1600.0 Vpp | Set Divert Valve | Waste     |

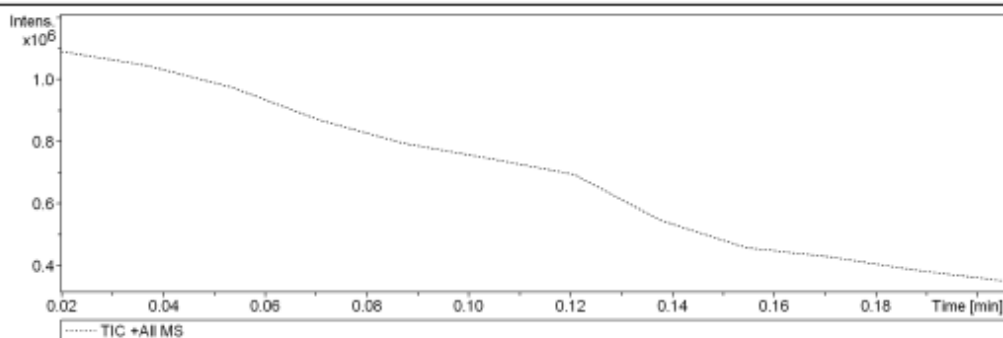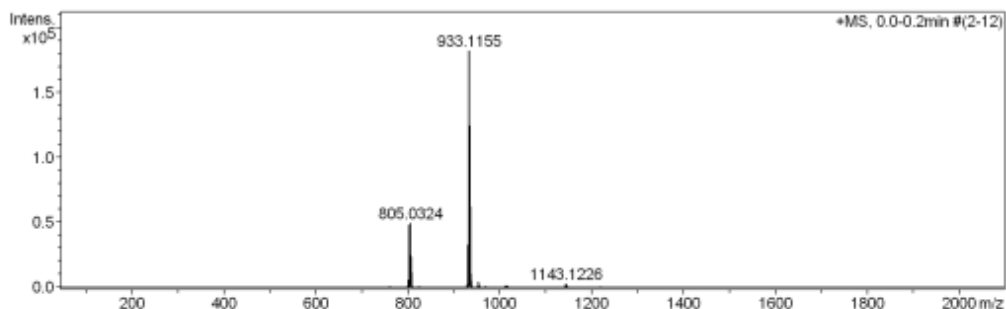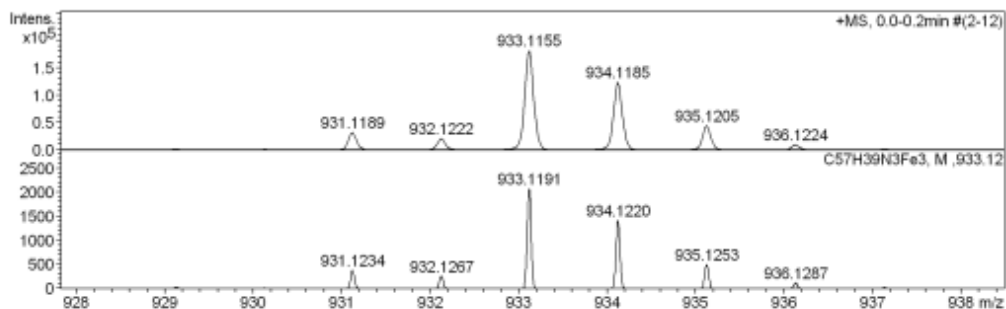

**Fig. S-3:** HRMS mass spectrum of compound 3

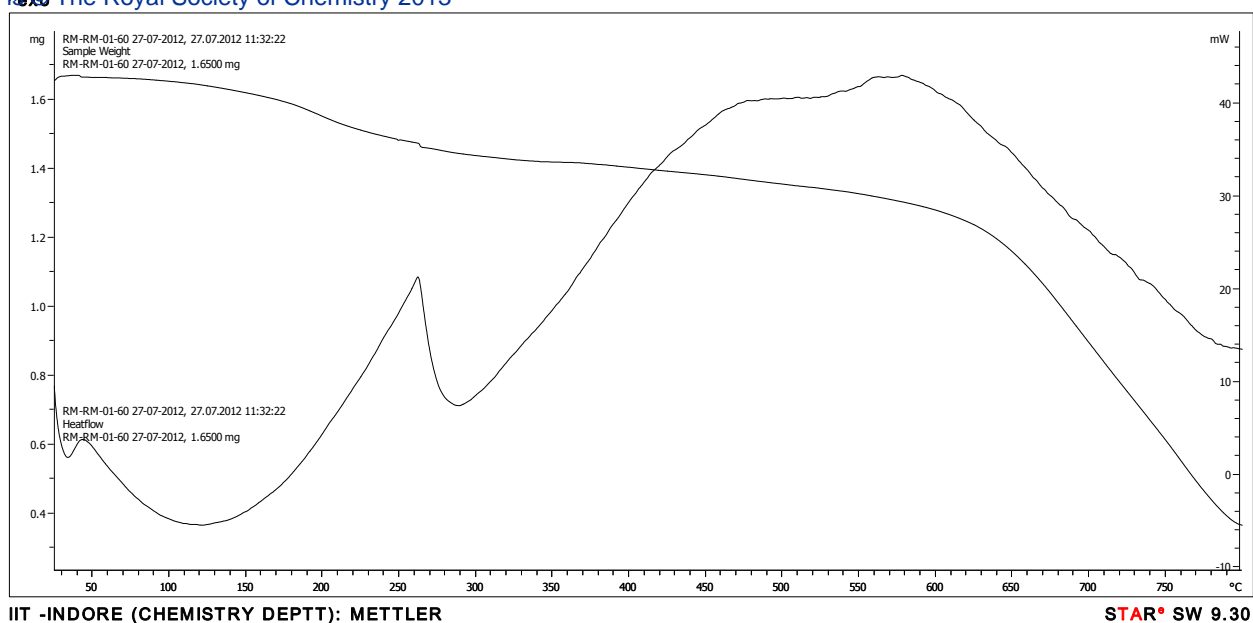

**Fig. S-4:** TGA and DSC spectrum of compound **3**

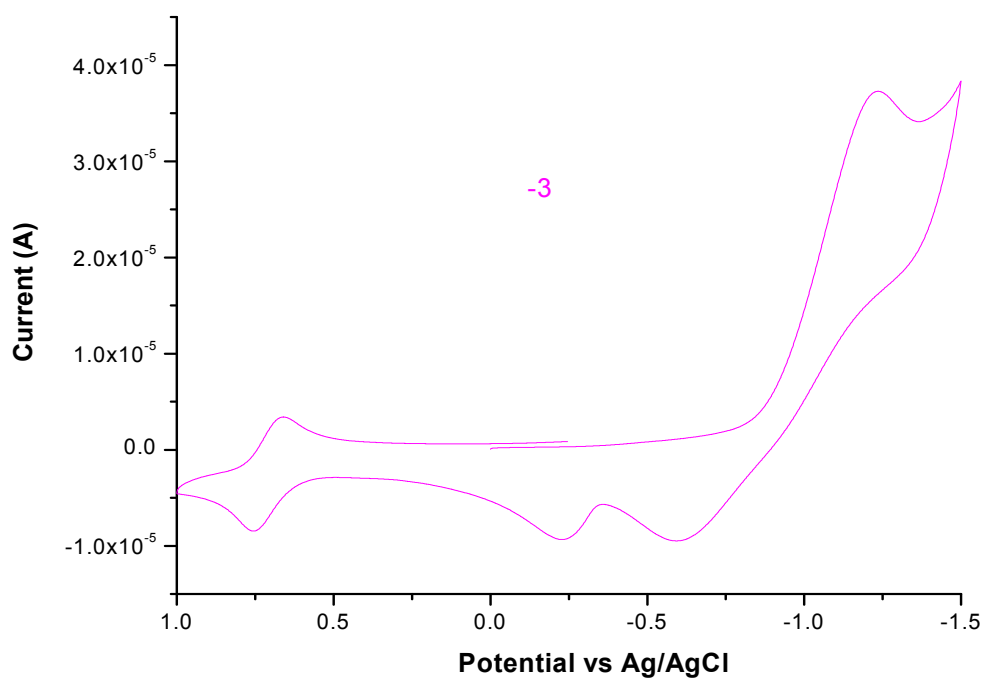

**Fig.S-5:** Cyclic voltammogram of compound **3** in 0.1 M solution of  $\text{Bu}_4\text{NPF}_6$  in THF ( $1.0 \times 10^{-4}$  M) at  $100 \text{ mV S}^{-1}$  scan rate.



### 2,4,6-Tris-(3-ferrocenylethynyl-phenyl)-1,3,5-triazine (4)

The triazine **2b** (0.200 g, 0.36 mmol) was dissolved in the mixture of toluene 30 ml and THF 10 ml (3;1), triethylamine (5 ml), and Pd(PPh<sub>3</sub>)<sub>2</sub>Cl<sub>2</sub> (0.035 g, 0.04 mmol), PPh<sub>3</sub> (0.0106 g, 0.04 mmol), ethynyl ferrocene (0.260 g, 1.23 mmol) was added under argon atmosphere, and stirred for 16 h at 60 °C, after completion of the reaction, the reaction mixture was concentrated under reduced pressure, the crude compound was purified by column chromatography on silica gel, using hexane/ DCM (70:30) to get triazine **4** as a yellow solid (0.120 g, 34%); <sup>1</sup>H NMR (400 MHz, CDCl<sub>3</sub>): δ = 8.81 (s, 3H), 8.68 (d, 3H), 7.68 (d, 3H), 7.51 (t, 3H) 4.51 (t, 6H), 4.22 (s, 12H), 4.20 (t, 6H) ppm; <sup>13</sup>C NMR (100 MHz, CDCl<sub>3</sub>): δ = 171.35, 136.29, 135.43, 131.79, 128.27, 124.65, 89.39, 85.45, 71.57, 70.05, 69.78, 68.96, 65.02, 31.59, 29.71, 22.66, 14.12. ppm; HRMS (ESI): calcd. for C<sub>57</sub>H<sub>39</sub>Fe<sub>3</sub>N<sub>3</sub> 933.1191 [M<sup>+</sup>]; found 933.1204.

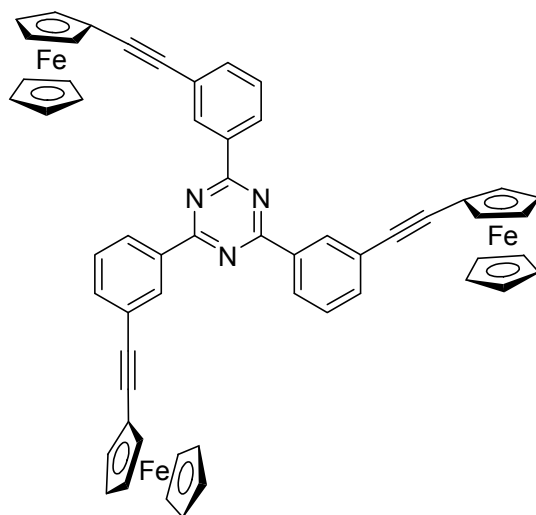

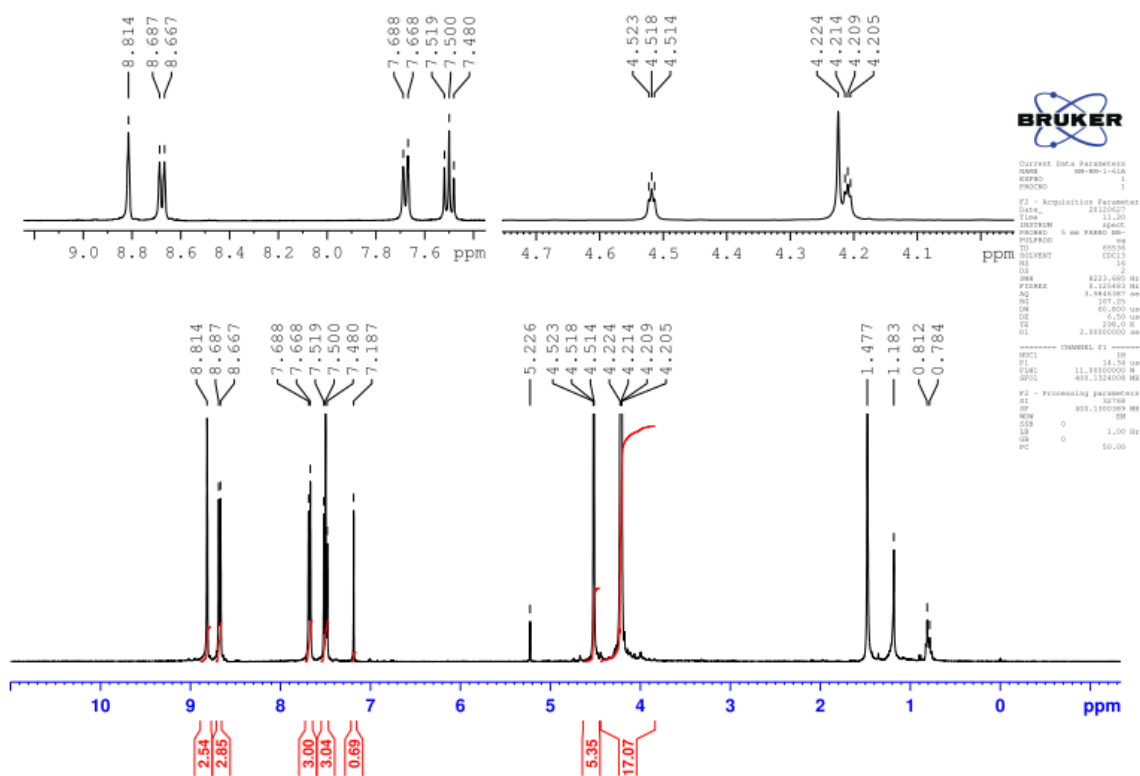

Fig. S-6: <sup>1</sup>H-NMR spectrum of compound 4 recorded in CDCl<sub>3</sub>

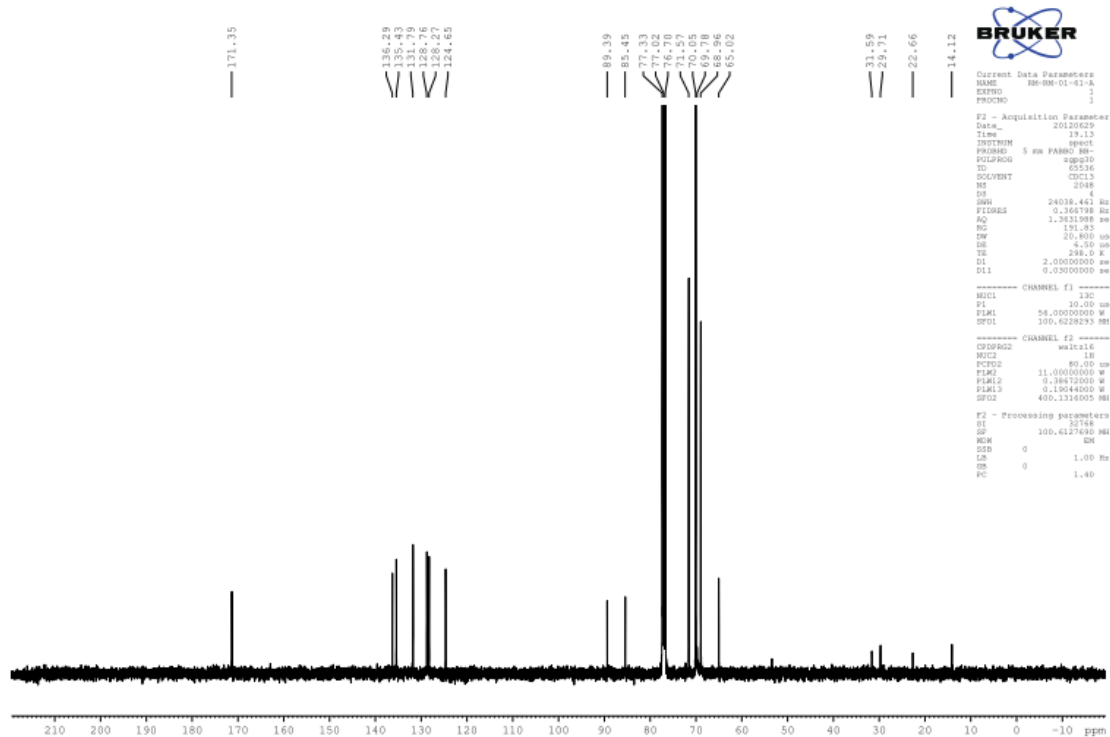

Fig. S-7: <sup>13</sup>C-NMR spectrum of compound 4 recorded in CDCl<sub>3</sub>

**Analysis Info**

Analysis Name D:\Data\UserData\RM-RM-01-61-A 26-06-2012\_d  
Method tune\_high.m  
Sample Name Blank  
Comment

Acquisition Date 6/26/2012 10:51:10 AM

Operator RAJESH VASHISTH  
Instrument micrOTOF-Q II 10348

**Acquisition Parameter**

|             |            |                       |            |                  |           |
|-------------|------------|-----------------------|------------|------------------|-----------|
| Source Type | ESI        | Ion Polarity          | Positive   | Set Nebulizer    | 0.4 Bar   |
| Focus       | Not active | Set Capillary         | 4500 V     | Set Dry Heater   | 180 °C    |
| Scan Begin  | 50 m/z     | Set End Plate Offset  | -500 V     | Set Dry Gas      | 4.0 l/min |
| Scan End    | 3000 m/z   | Set Collision Cell RF | 1600.0 Vpp | Set Divert Valve | Waste     |

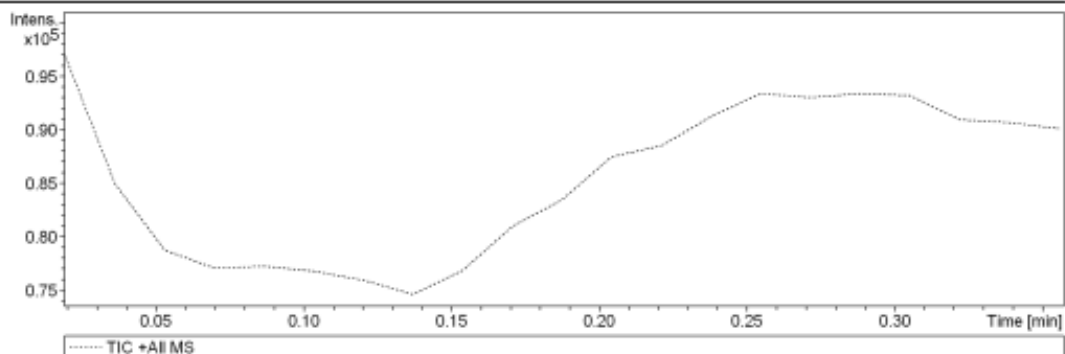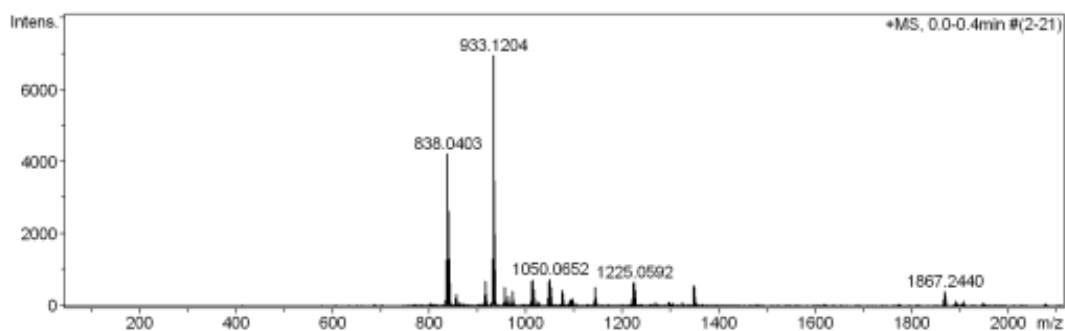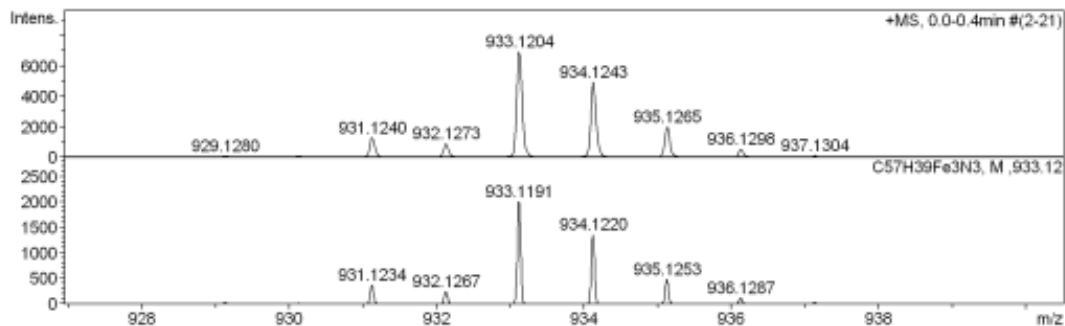

**Fig. S-8:** HRMS mass spectrum of compound 4

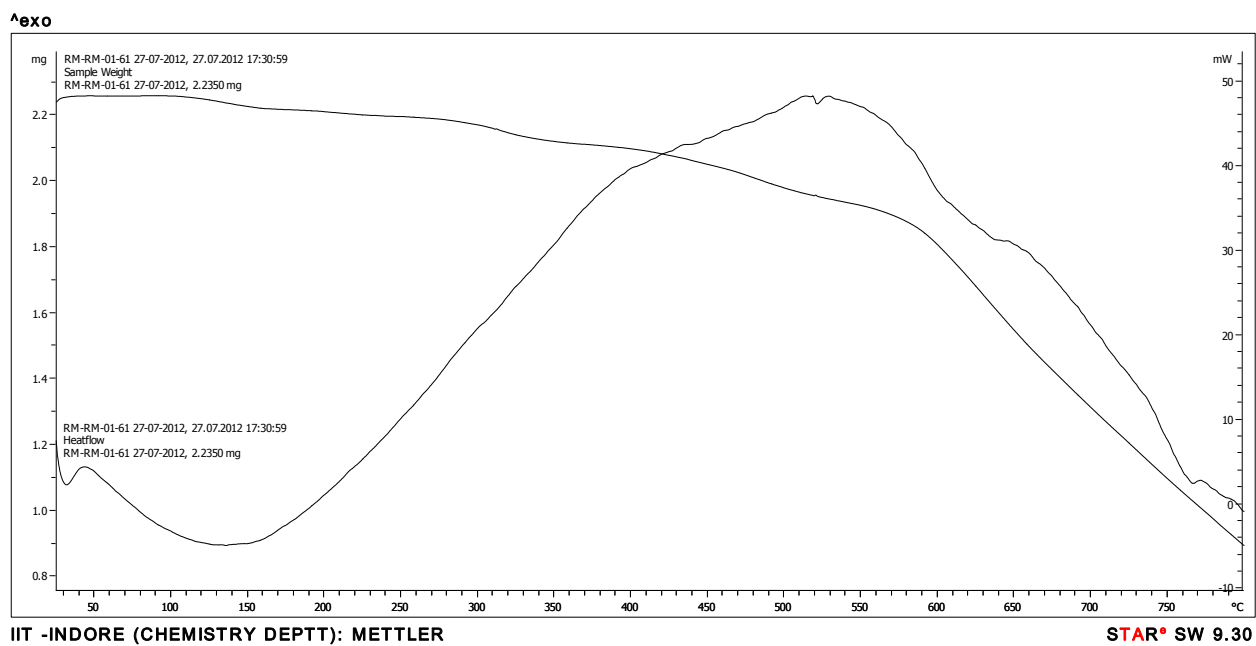

IIT -INDORE (CHEMISTRY DEPTT): METTLER

STAR® SW 9.30

Fig. S-9: TGA and DSC spectrum of compound 4

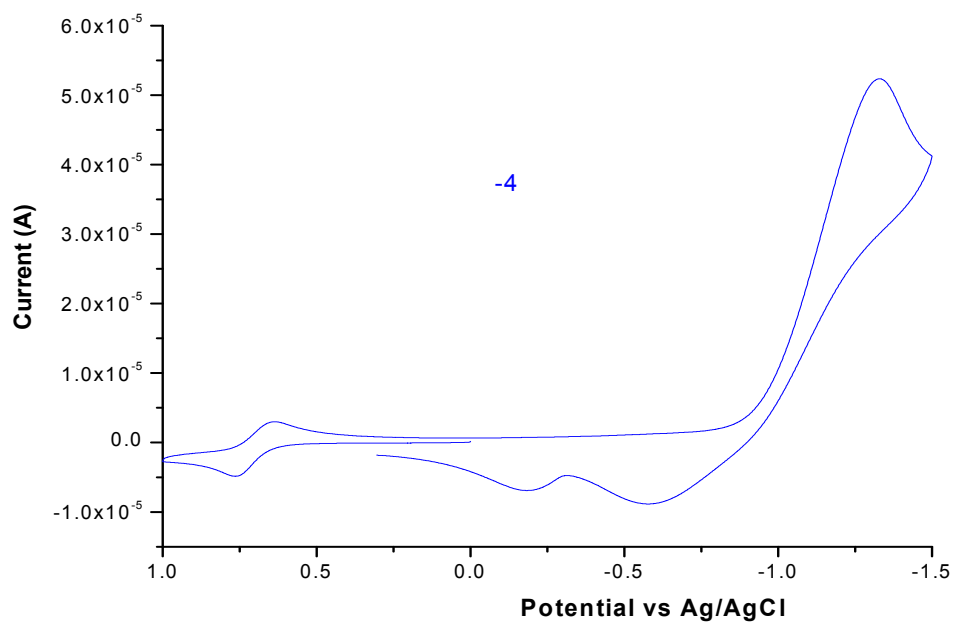

Fig.S-10: Cyclic voltammogram of compound 4 in 0.1 M solution of  $\text{Bu}_4\text{NPF}_6$  in THF ( $1.0 \times 10^{-4} \text{ M}$ ) at  $100 \text{ mV S}^{-1}$  scan rate.

### 2,4,6-Tris-(4-(4-ferrocene-phenylethynyl)-phenyl)-(1,3,5)triazine (**5**)

The triazine **2a** (0.100 g, 0.18 mmol ) was dissolved in the mixture of toluene 10 ml, and THF 3 ml (3;1), triethylamine (3 ml), and Pd(PPh<sub>3</sub>)<sub>4</sub> (0.030 g, 0.02 mmol), ferrocene-4-ethynyl benzene (0.171 g, 0.59 mmol) was added under argon atmosphere, and stirred for 8 h at 85 °C in microwave, after completion of the reaction, the reaction mixture was concentrated under reduced pressure, the crude compound was purified by column chromatography on silica gel, using hexane/ DCM (50:50), to get triazine **5** as a yellow solid (0.075 g, 35%); <sup>1</sup>H NMR (400 MHz, CDCl<sub>3</sub>): δ =8.71 (d, 6H, *J* = 8.4 Hz), 7.68 (d, 6H, *J* = 8.4 Hz), 7.43 (q, 12H), 4.62 (s, 7H), 4.30 (s, 7H), 3.98 (s, 13H) ppm; <sup>13</sup>C NMR (100 MHz, CDCl<sub>3</sub>): δ = 179.26, 171.12, 162.96, 140.48, 135.50, 131.82, 131.78, 128.93, 127.88, 125.89, 119.97, 92.84, 89.39, 84.10, 69.76, 69.47, 66.58. ppm; HRMS (ESI): calcd. for C<sub>75</sub>H<sub>51</sub>Fe<sub>3</sub>N<sub>3</sub> 1161.2133 [M<sup>+</sup>]; found 1161.2402.

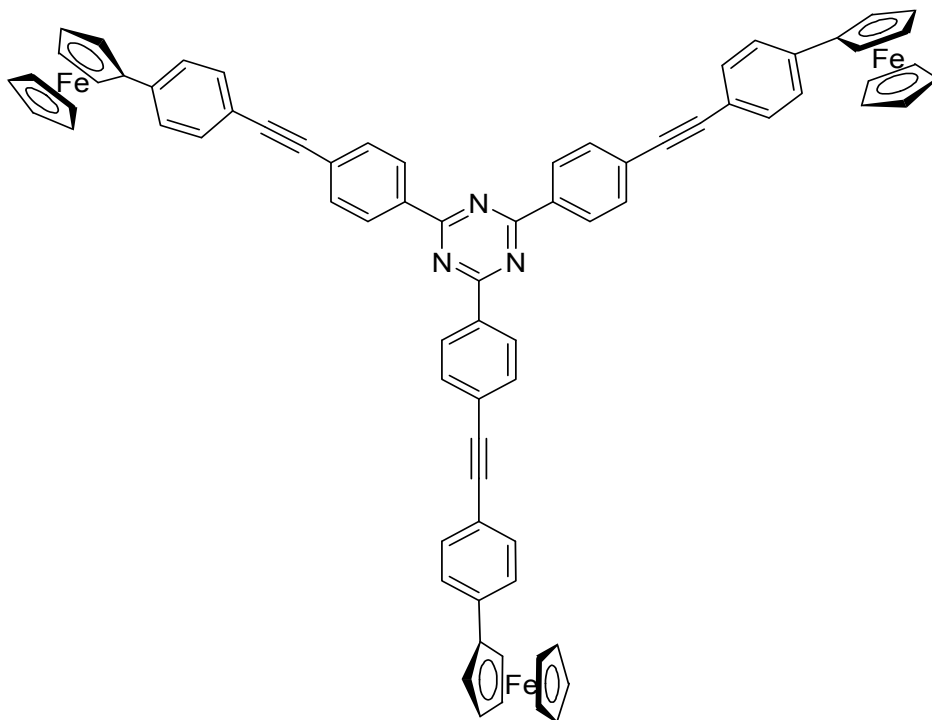

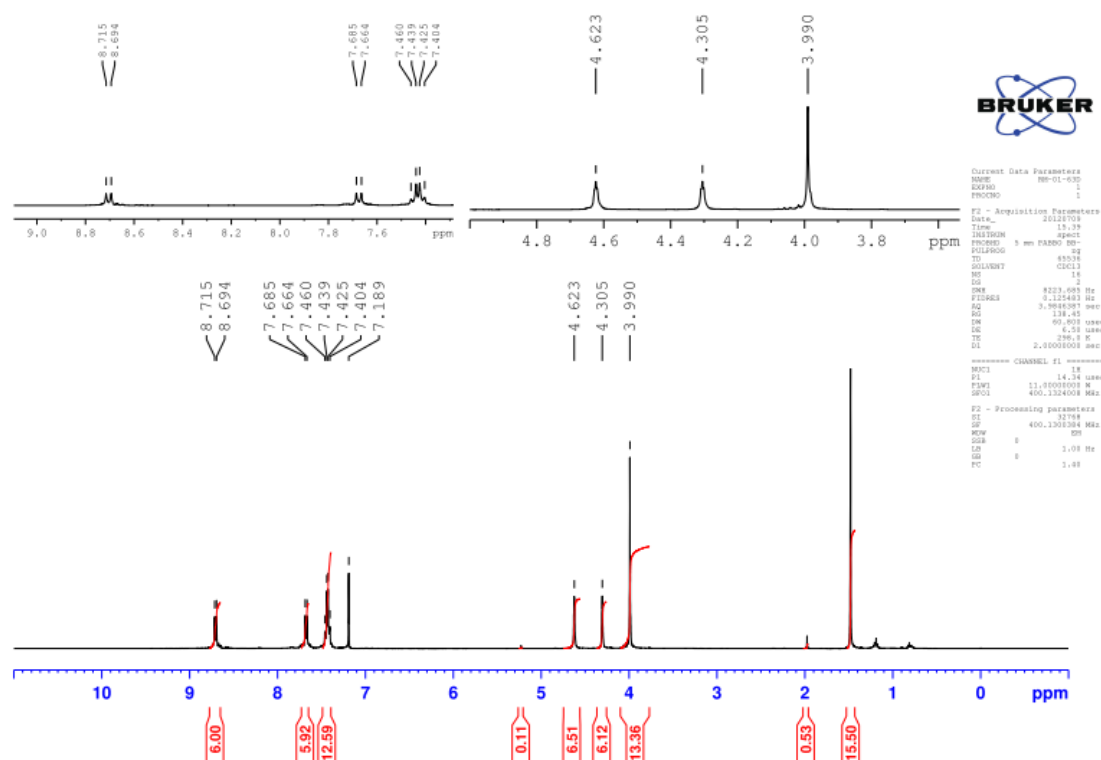

Fig. S-11:  $^1\text{H}$ -NMR spectrum of compound **5** recorded in  $\text{CDCl}_3$ .

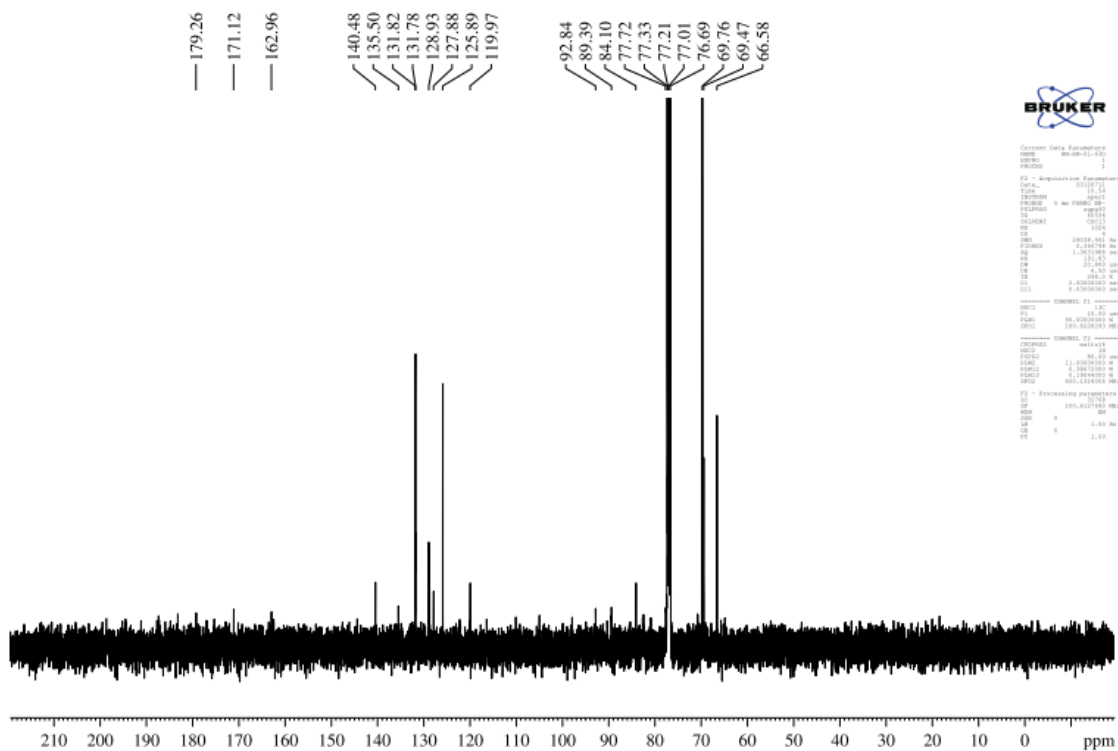

Fig. S-12:  $^{13}\text{C}$ -NMR spectrum of compound **5** recorded in  $\text{CDCl}_3$ .

**Analysis Info**

Analysis Name D:\Data\UserData\RM-RM-01-63-D 09-07-2012\_d  
Method tune\_high.m  
Sample Name  
Comment

Acquisition Date 7/9/2012 5:30:20 PM

Operator Ghanashyam  
Instrument micrOTOF-Q II 10348

**Acquisition Parameter**

|             |            |                       |            |                  |           |
|-------------|------------|-----------------------|------------|------------------|-----------|
| Source Type | ESI        | Ion Polarity          | Positive   | Set Nebulizer    | 0.4 Bar   |
| Focus       | Not active | Set Capillary         | 4500 V     | Set Dry Heater   | 180 °C    |
| Scan Begin  | 50 m/z     | Set End Plate Offset  | -500 V     | Set Dry Gas      | 4.0 l/min |
| Scan End    | 3000 m/z   | Set Collision Cell RF | 1600.0 Vpp | Set Divert Valve | Waste     |

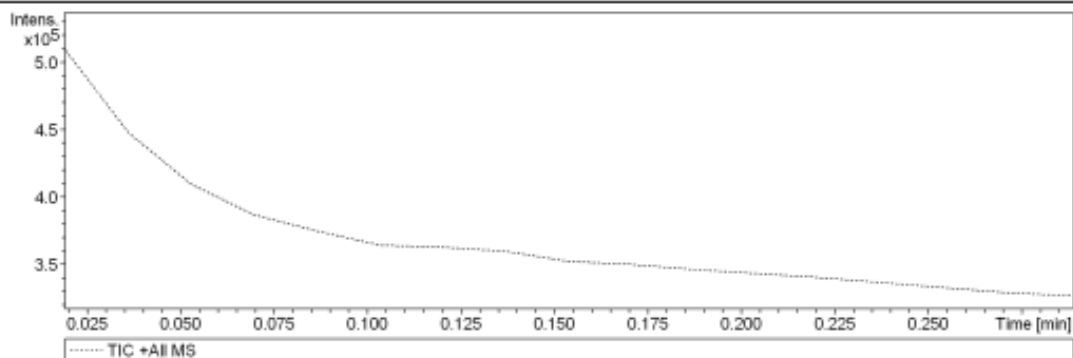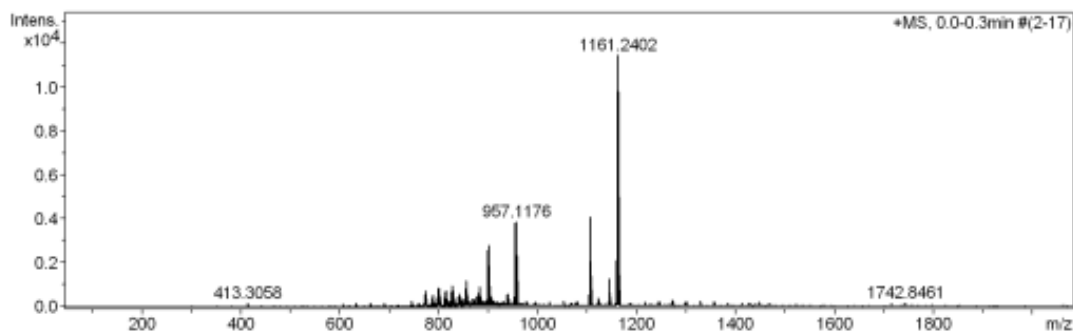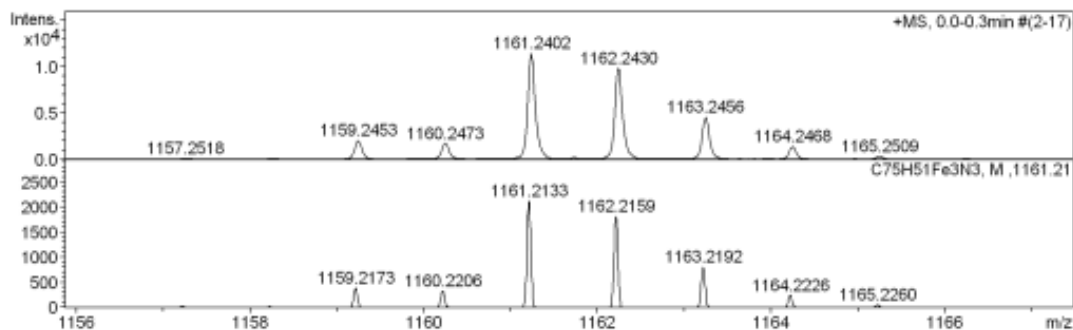

**Fig. S-13:** HRMS mass spectrum of compound 5.

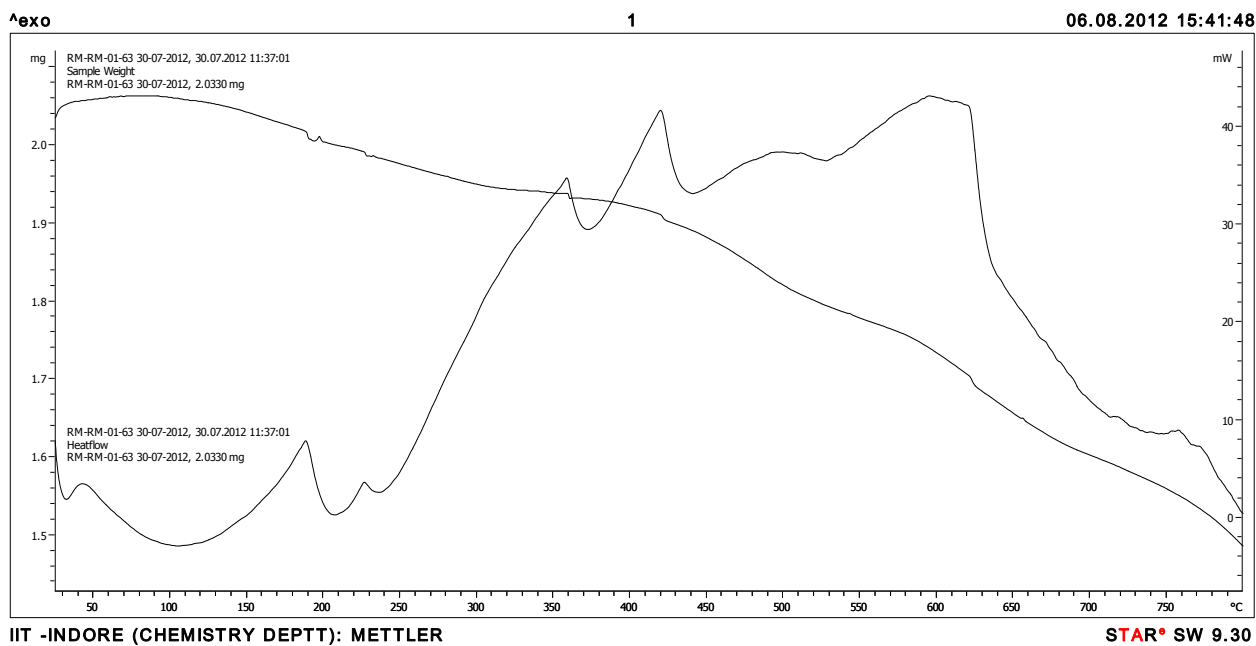

Fig. S-14: TGA and DSC spectrum of compound 5

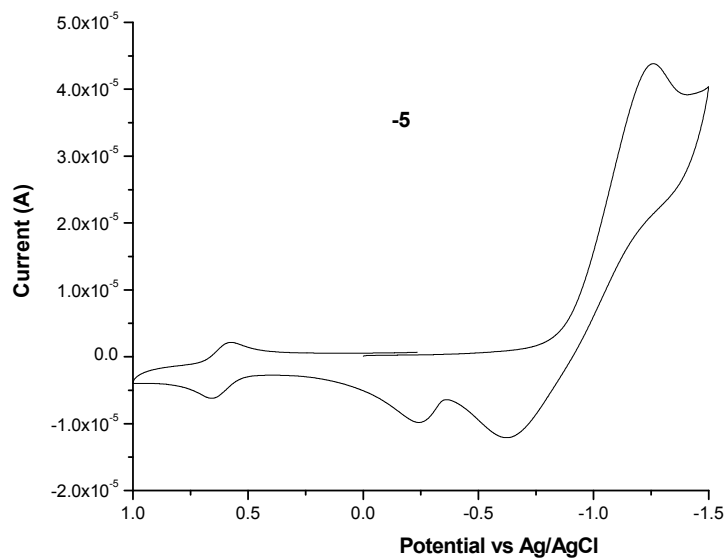

Fig.S-15: Cyclic voltammogram of compound 5 in 0.1 M solution of  $\text{Bu}_4\text{NPF}_6$  in THF ( $1.0 \times 10^{-4}$  M) at  $100 \text{ mV S}^{-1}$  scan rate.



### 2,4,6-Tris-(4-(3-ferrocene-phenylethynyl)-phenyl)-(1,3,5)triazine (6)

The triazine **2a** (0.100 g, 0.18 mmol) was dissolved in the mixture of toluene 10 ml, and THF 3 ml (3;1), triethylamine (3 ml), and Pd(PPh<sub>3</sub>)<sub>4</sub> (0.030 g, 0.02 mmol), ferrocene-3-ethynyl benzene (0.171 g, 0.59 mmol) was added under argon atmosphere, and stirred for 8 h at 85 °C in microwave, after completion of the reaction, the reaction mixture was concentrated under reduced pressure, the crude compound was purified by column chromatography on silica gel, using hexane/ DCM (60:40) to get triazine **6** as a yellow solid (0.069 g, 32%); <sup>1</sup>H NMR (400 MHz, CDCl<sub>3</sub>): δ = 8.80 (d, 6H, *J* = 7.9 Hz), 7.80 (d, 6H, *J* = 8 Hz), 7.72 (s, 3H), 7.53 (d, 3H), 7.47 (d, 3H), 7.33 (t, 3H), 4.73 (s, 6H), 4.38 (s, 6H), 4.11 (s, 15H) ppm; <sup>13</sup>C NMR (100 MHz, CDCl<sub>3</sub>): δ = 171.06, 139.91, 135.65, 131.92, 130.52, 129.29, 129.01, 128.95, 128.52, 127.66, 126.49, 122.90, 92.58, 89.10, 84.23, 69.73, 69.26, 66.56 ppm; HRMS (ESI): calcd. for C<sub>75</sub>H<sub>51</sub>Fe<sub>3</sub>N<sub>3</sub> 1161.2133 [M<sup>+</sup>]; found 1161.2226.

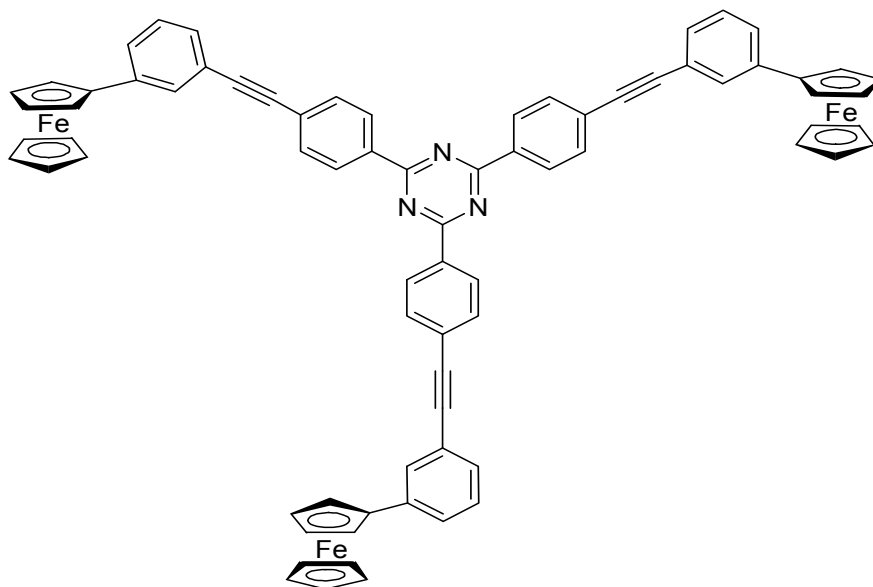

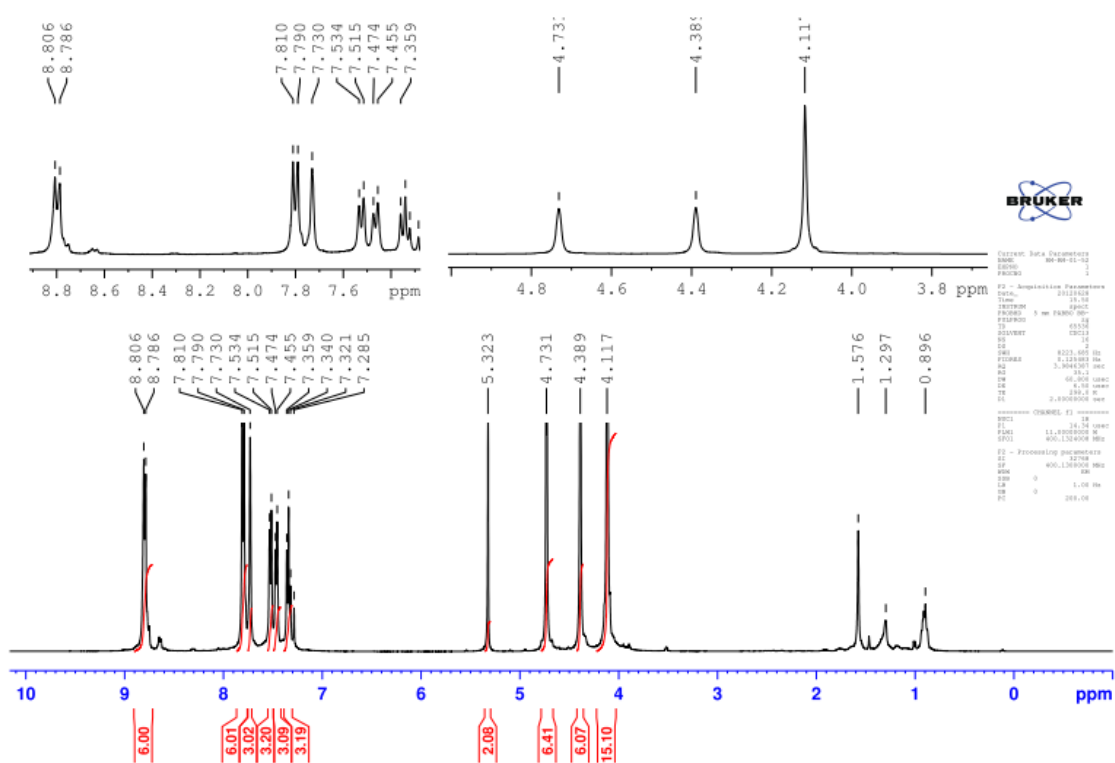

**Fig. S-16:**  $^1\text{H-NMR}$  spectrum of compound **6** recorded in  $\text{CDCl}_3$ .

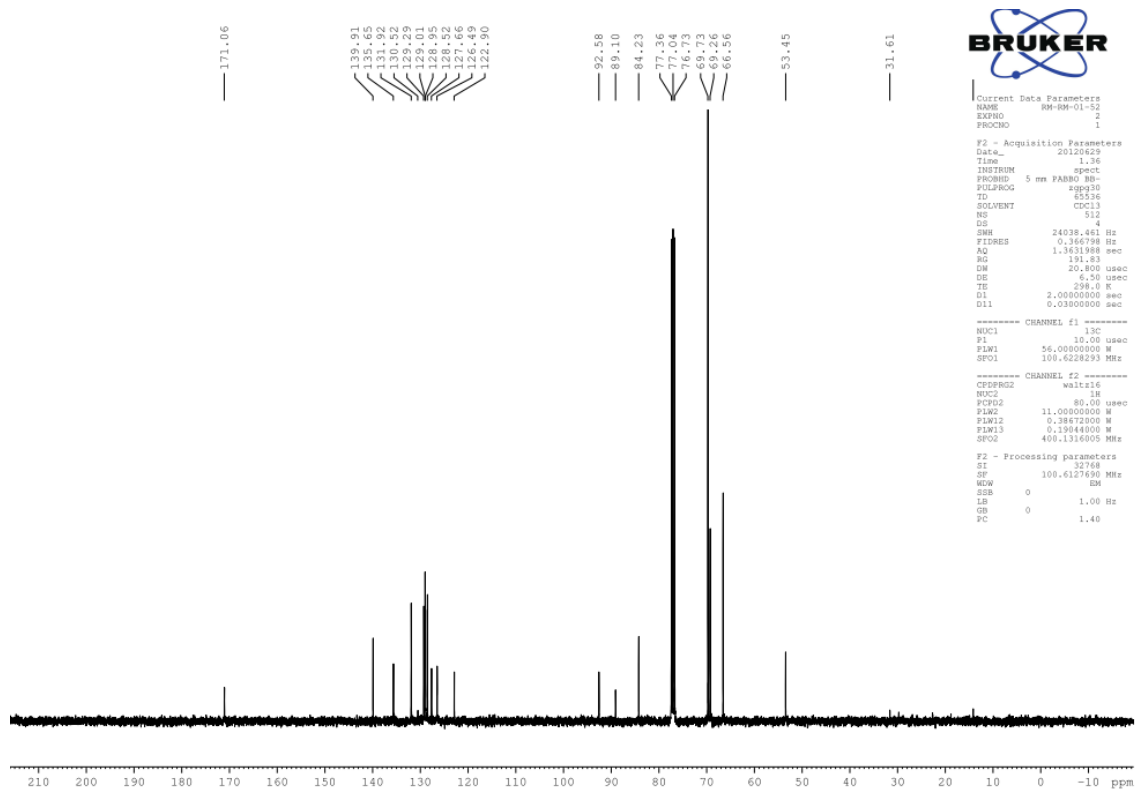

**Fig. S-17:**  $^{13}\text{C-NMR}$  spectrum of compound **6** recorded in  $\text{CDCl}_3$ .

## Display Report

|                      |                                           |                  |                      |
|----------------------|-------------------------------------------|------------------|----------------------|
| <b>Analysis Info</b> |                                           | Acquisition Date | 6/29/2012 3:25:51 PM |
| Analysis Name        | D:\Data\UserData\RM-RM-01-52 29-06-2012.d | Operator         | RAJESH VASHISTH      |
| Method               | tune_high.m                               | Instrument       | micrOTOF-Q II 10348  |
| Sample Name          | in chloroform                             |                  |                      |
| Comment              |                                           |                  |                      |

### Acquisition Parameter

|             |            |                       |            |                  |           |
|-------------|------------|-----------------------|------------|------------------|-----------|
| Source Type | ESI        | Ion Polarity          | Positive   | Set Nebulizer    | 0.4 Bar   |
| Focus       | Not active | Set Capillary         | 4500 V     | Set Dry Heater   | 180 °C    |
| Scan Begin  | 50 m/z     | Set End Plate Offset  | -500 V     | Set Dry Gas      | 4.0 l/min |
| Scan End    | 3000 m/z   | Set Collision Cell RF | 1600.0 Vpp | Set Divert Valve | Waste     |

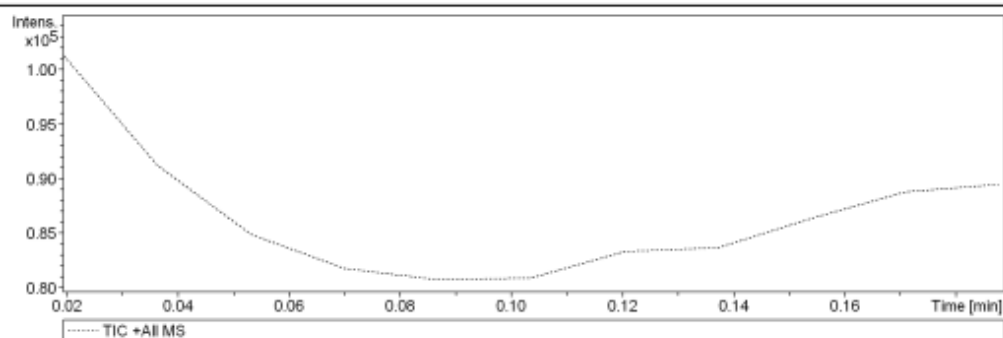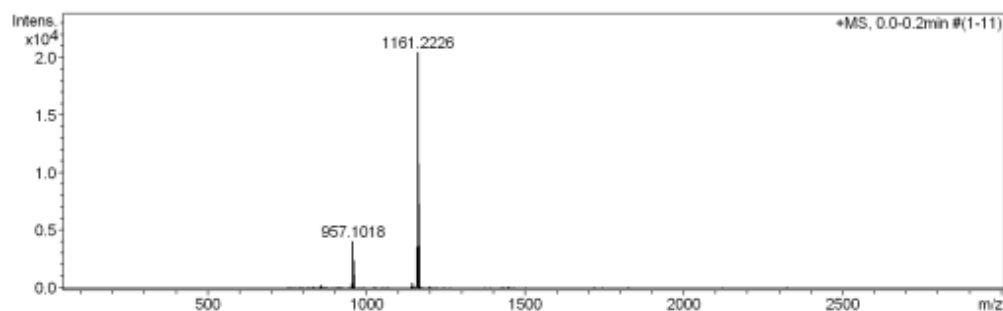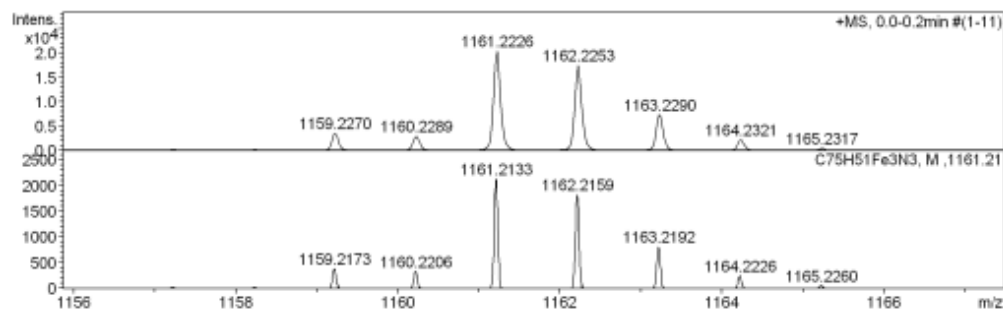

**Fig. S-18:** HRMS mass spectrum of compound 6.

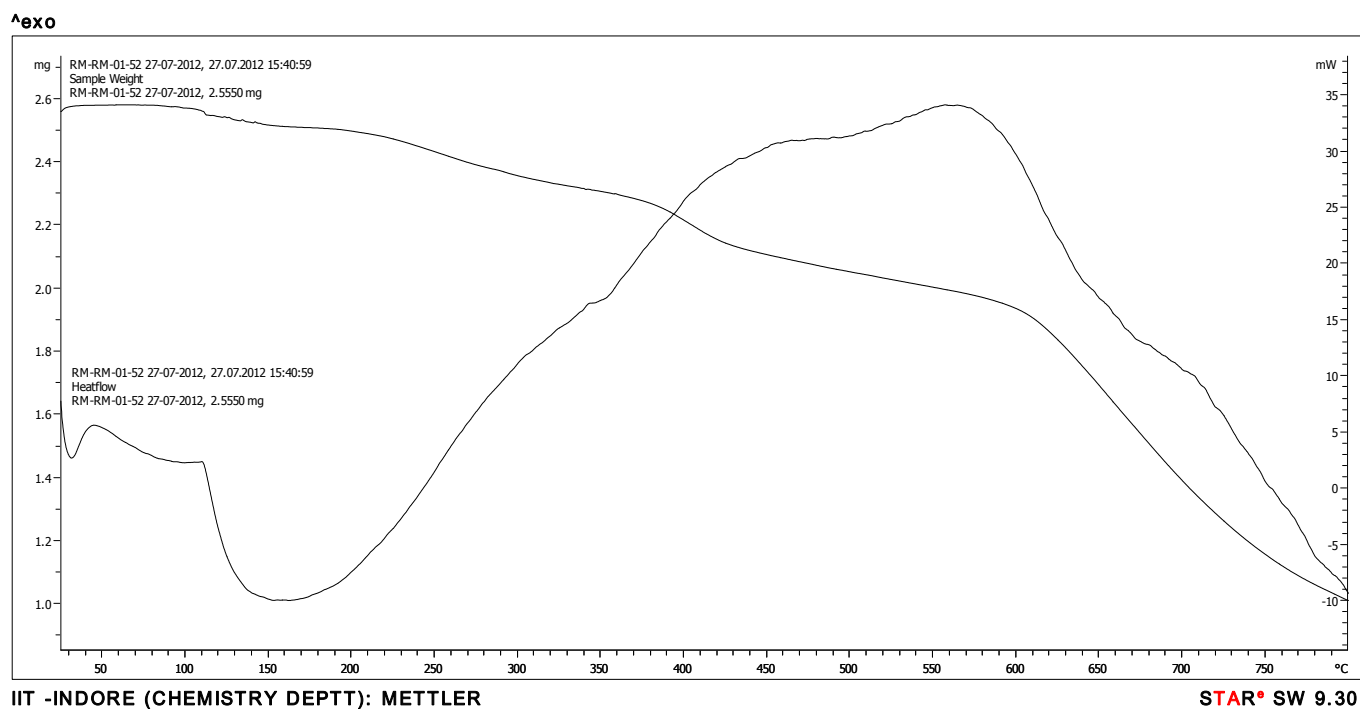

Fig. S-19: TGA and DSC spectrum of compound **6**

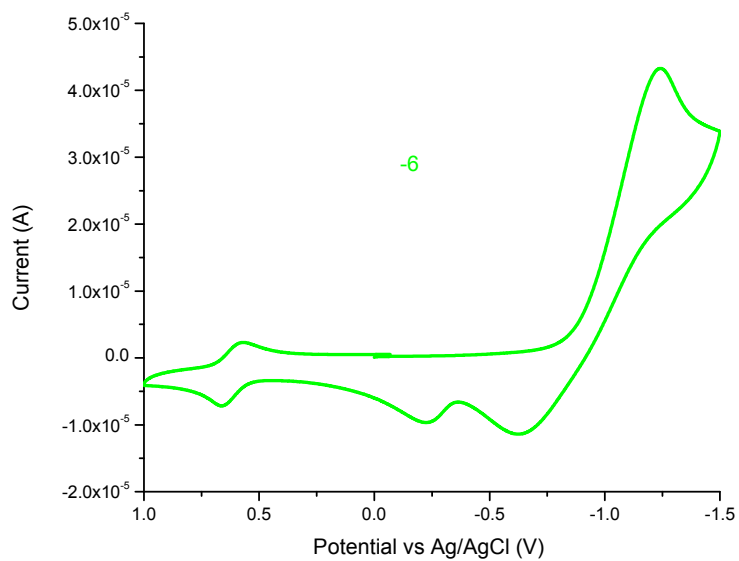

Fig.S-20: Cyclic voltammogram of compound **6** in 0.1 M solution of  $\text{Bu}_4\text{NPF}_6$  in THF ( $1.0 \times 10^{-4}$  M) at  $100 \text{ mV S}^{-1}$  scan rate.

### TGA of Compounds 3-6

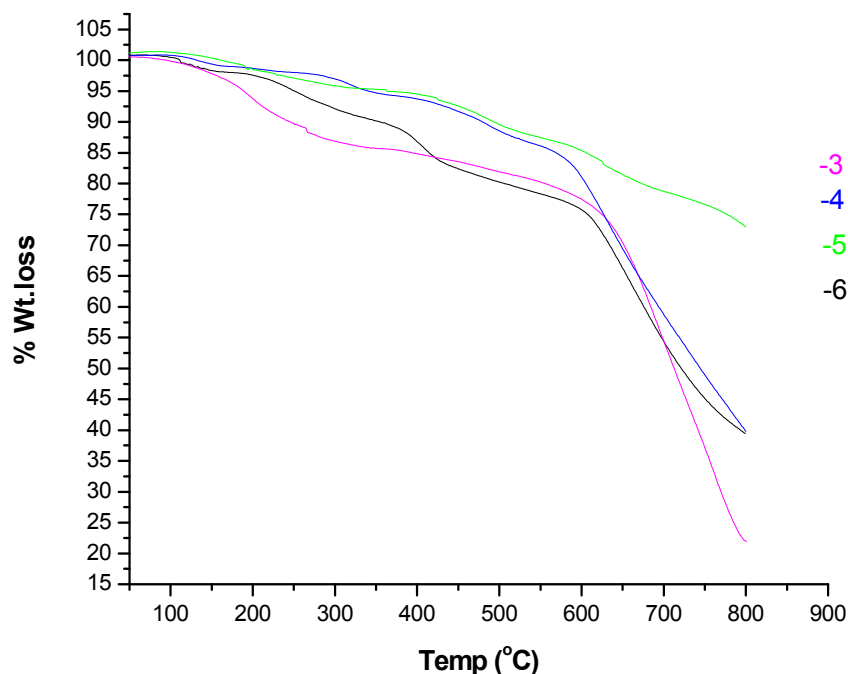

**Fig.S-21:** The triazines **3-6** shows 10 % wt. loss around 260 °C to 500 °C

#### X-ray crystallography

Single crystal X-ray structural studies of **3** were performed on a CCD Agilent Technologies (Oxford Diffraction) SUPER NOVA diffractometer. Data were collected at 293(2) K using graphite-monochromated Mo K $\alpha$  radiation ( $\lambda = 0.71073$  Å). The strategy for the Data collection was evaluated by using the CrysAlisPro CCD software. The data were collected by the standard 'phi-omega scan techniques, and were scaled and reduced using CrysAlisPro RED software. The structures were solved by direct methods using SHELXS-97 and refined by full matrix least-squares with SHELXL-97. The positions of all the atoms were obtained by direct methods. All non-hydrogen atoms were refined anisotropic ally. The remaining hydrogen atoms were placed in geometrically constrained positions and refined with isotropic temperature factors, generally 1.2Ueq of their parent atoms. The crystal and refinement data are summarized in Table 3. The CCDC-899827 (for **3**) contain the supplementary crystallographic data for this paper. These data can be obtained free of charge via [www.ccdc.cam.ac.uk/conts/retrieving.html](http://www.ccdc.cam.ac.uk/conts/retrieving.html) (or from the Cambridge Crystallographic Centre, 12 union Road, Cambridge CB21 EZ, UK; Fax: (+44) 1223-336-033; or [deposit@ccdc.cam.ac.uk](mailto:deposit@ccdc.cam.ac.uk)).

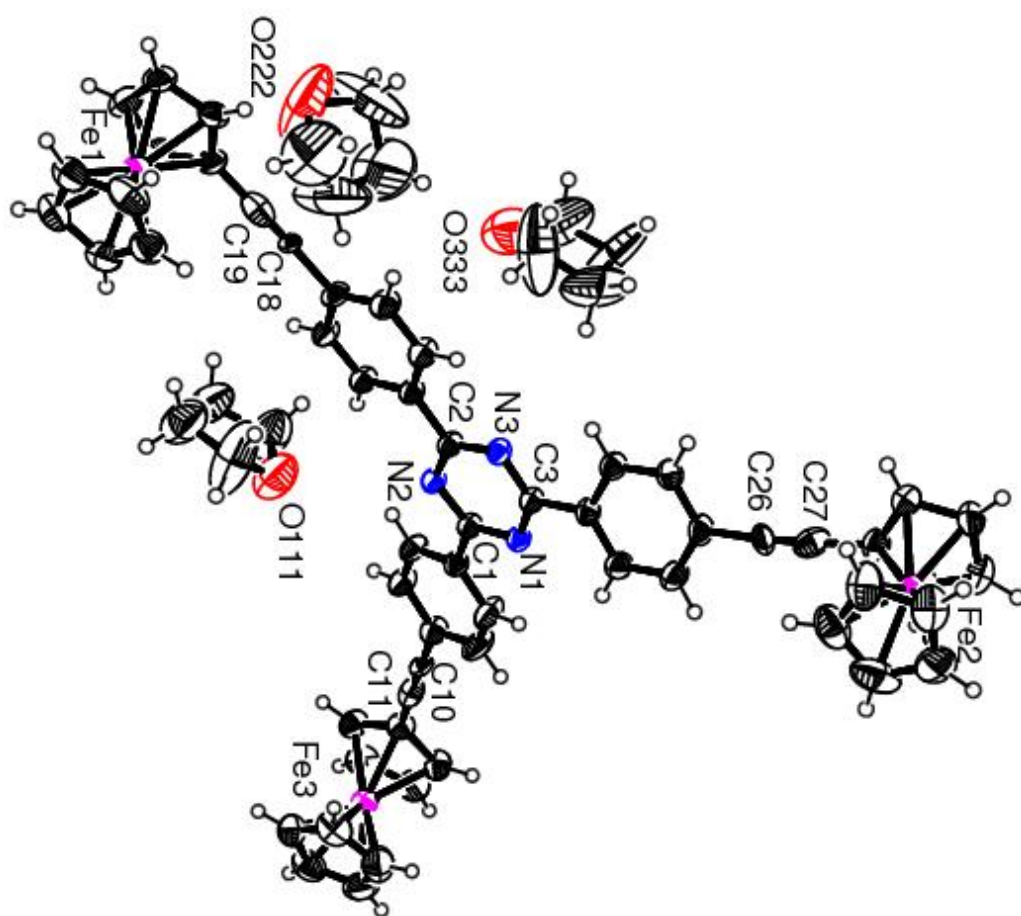

**Fig.S-22:** Single crystal X-ray structure of triazine **3**, (50 % probability chosen for ellipsoids).

**Table 2.** The selected bond lengths, and bond angles of compound **3**

| Bond lengths (Å) |          | Bond angles °     |          |
|------------------|----------|-------------------|----------|
| N(1)-C(1)        | 1.337(5) | C(1)-N(1)-C(3)    | 115.0(4) |
| N(1)-C(3)        | 1.340(6) | C(1)-N(2)-C(2)    | 115.2(4) |
| N(2)-C(1)        | 1.335(5) | C(2)-N(3)-C(3)    | 114.5(4) |
| N(2)-C(2)        | 1.341(5) | N(2)-C(1)-N(1)    | 124.9(4) |
| N(3)-C(2)        | 1.341(5) | N(2)-C(1)-C(4)    | 117.7(4) |
| N(3)-C(3)        | 1.343(5) | N(1)-C(1)-C(4)    | 117.3(4) |
| C(1)-C(4)        | 1.485(6) | N(2)-C(2)-N(3)    | 125.1(4) |
| C(2)-C(12)       | 1.484(6) | N(2)-C(2)-C(12)   | 117.3(4) |
| C(3)-C(20)       | 1.479(6) | N(3)-C(2)-C(12)   | 117.7(4) |
| C(23)-C(26)      | 1.502(6) | N(1)-C(3)-N(3)    | 125.2(4) |
| C(26)-C(27)      | 1.108(7) | N(1)-C(3)-C(20)   | 117.0(4) |
| C(27)-C(48)      | 1.453(7) | C(18)-C(19)-C(38) | 179.6(6) |
| C(10)-C(11)      | 1.069(7) | C(26)-C(27)-C(48) | 177.9(6) |
| C(11)-C(28)      | 1.467(7) | C(10)-C(11)-C(28) | 175.5(6) |
| C(7)-C(10)       | 1.525(7) | C(5)-C(4)-C(1)    | 120.3(4) |
| C(15)-C(18)      | 1.546(6) | C(13)-C(12)-C(2)  | 120.5(4) |
| C(18)-C(19)      | 1.033(7) | C(21)-C(20)-C(3)  | 120.3(4) |
| C(19)-C(38)      | 1.486(8) |                   |          |

**Table 3.** Crystallographic data and structure refinement detail for compound **3**

| <b>Compound</b>                   | <b>3</b>                                                                      |
|-----------------------------------|-------------------------------------------------------------------------------|
| Empirical formula                 | C <sub>69</sub> H <sub>63</sub> Fe <sub>3</sub> N <sub>3</sub> O <sub>3</sub> |
| Formula weight                    | 1149.77                                                                       |
| Crystal system                    | Triclinic                                                                     |
| Space group                       | <i>P</i> $\bar{1}$                                                            |
| Unit cell dimensions              |                                                                               |
| a (Å)                             | 11.750(5)                                                                     |
| b (Å)                             | 15.514(5)                                                                     |
| c (Å)                             | 16.213(5)                                                                     |
| Volume                            | 2703.5(17) Å <sup>3</sup>                                                     |
| Z, Calculated density             | 2, 1.412 Mg/m <sup>3</sup>                                                    |
| Absorption coefficient            | 0.848 mm <sup>-1</sup>                                                        |
| Max. and min. transmission        | 0.8345 and 0.7569                                                             |
| F (000)                           | 1200                                                                          |
| Crystal size                      | 0.23 x 0.18 x 0.13 mm                                                         |
| Theta range for data collection   | 2.93 to 25.00 deg.                                                            |
| Completeness to theta             | 25.00 99.8 %                                                                  |
| Reflections collected / unique    | 21732 / 9514 [R (int) = 0.0242]                                               |
| Data / restraints / parameters    | 9514 / 0 / 703                                                                |
| Goodness-of-fit on F <sup>2</sup> | 1.038                                                                         |
| Refinement method                 | Full-matrix least-squares on F <sup>2</sup><br>R1 = 0.0720, wR2 = 0.2014      |



|                                                                                             |                                                                 |
|---------------------------------------------------------------------------------------------|-----------------------------------------------------------------|
| Final R indices [ $I > 2\sigma(I)$ ]<br>R indices (all data)<br>Largest diff. peak and hole | R1 = 0.0839, wR2 = 0.2135<br>1.117 and -0.903 e.Å <sup>-3</sup> |
|---------------------------------------------------------------------------------------------|-----------------------------------------------------------------|
